# Supplementary material for: Escalating incidence of infective endocarditis in Europe in the 21st century
Source: PubMed Central journal article supplement — Open Heart. 2021 Oct 20;8(2):e001846. doi: 10.1136/openhrt-2021-001846 (PMC8529987; doi:10.1136/openhrt-2021-001846), 2021-10-20

**APPENDIX****ONLINE SEARCH STRATEGY:****EBM Reviews:**

((incidence\* or epidemio\*).ab,fs,hw,ti or (((number or new) adj2 cases) or surveillance or biosurveillance or pharmacoepidemiolog\* or seroepidemio\* or (morbidity adj2 (rate\* or pattern\*)) or infection-rate\* or sampl\* or age-distribution or sex-distribution or geographic-distribution\* or case-mix or community-assessment\* or disease-registr\* or prevalence).ab,fs,hw,ti.) AND (endocarditis.hw,ti. or (endocarditis adj5 (incidence\* or epidemio\* or cases or surveillance or biosurveillance or pharmacoepidemiolog\* or seroepidemio\* or rate\* or prevalence)).ab,hw,ti.) NOT ("case report".pt,ti.) Limit to English, 2000+

**Embase (1974+)**

(exp incidence/ or exp epidemiological data/ or exp epidemiology/ or (((number or new) adj2 cases) or surveillance or biosurveillance or pharmacoepidemiolog\* or seroepidemio\* or (morbidity adj2 (rate\* or pattern\*)) or infection-rate\* or sampl\* or age-distribution or sex-distribution or geographic-distribution\* or case-mix or community-assessment\* or disease-registr\* or prevalence).ab,kw,ti.) AND (endocarditis/ or bacterial endocarditis/ or fungal endocarditis/ or prosthetic valve endocarditis/ or subacute endocarditis/ or [endocarditis.kw](#),ti. or (endocarditis adj5 (incidence\* or epidemio\* or cases or surveillance or biosurveillance or pharmacoepidemiolog\* or seroepidemio\* or rate\* or prevalence)).ab.) NOT (exp animal/ not exp human/, 12 "case report".kw,pt,ti.) Limit to English, 2000+, article or article in press

**Ovid MEDLINE(R) 1946 to Present and Epub Ahead of Print, In-Process & Other Non-Indexed Citations and Ovid MEDLINE(R) Daily:**

(Incidence/ or exp Epidemiology/ or exp Population Surveillance/ or (incidence\* or epidemio\*).ab,hw,kf,ti,fx. or (((number or new) adj2 cases) or surveillance or biosurveillance or pharmacoepidemiolog\* or seroepidemio\* or (morbidity adj2 (rate\* or pattern\*)) or infection-rate\* or sampl\* or age-distribution or sex-distribution or geographic-distribution\* or case-mix or community-assessment\* or disease-registr\* or prevalence).ab,kf,ti.) AND (Endocarditis, Bacterial/ or Endocarditis/ or Endocarditis, Subacute Bacterial/ or [endocarditis.kw](#),ti. or (endocarditis adj5 (incidence\* or epidemio\* or cases or surveillance or biosurveillance or pharmacoepidemiolog\* or seroepidemio\* or rate\* or prevalence)).ab.) NOT (exp Animals/ not Humans/, "case report".kw,pt,ti.) Limit to English, 2000+

**Scopus:**

(( ( TITLE ( endocarditis ) OR KEY ( endocarditis ) AND TITLE-ABS-KEY ( endocarditis W/5 ( incidence\* OR epidemio\* OR cases OR surveillance OR biosurveillance OR pharmacoepidemiolog\* OR seroepidemio\* OR rate\* OR prevalence ) ) ) ) AND ( ( TITLE ( endocarditis ) OR KEY ( endocarditis ) AND TITLE-ABS-KEY ( endocarditis W/5 ( incidence\*

OR epidemio\* OR cases OR surveillance OR biosurveillance OR pharmacoepidemiolog\* OR seroepidemio\* OR rate\* OR prevalence ) ) ) ) AND NOT ( TITLE ( "case report\*" OR animal\* OR rat OR rats OR mice OR mouse OR rabbit\* OR rodent\* ) ) AND ( LIMIT-TO ( DOCTYPE , "ar" ) OR LIMIT-TO ( DOCTYPE , "re" ) OR LIMIT-TO ( DOCTYPE , "er" ) ) AND ( LIMIT-TO ( LANGUAGE , "English" ) ) AND ( LIMIT-TO ( SRCTYPE , "j" ) ) AND ( LIMIT-TO ( PUBYEAR , 2020 ) OR LIMIT-TO ( PUBYEAR , 2019 ) OR LIMIT-TO ( PUBYEAR , 2018 ) OR LIMIT-TO ( PUBYEAR , 2017 ) OR LIMIT-TO ( PUBYEAR , 2016 ) OR LIMIT-TO ( PUBYEAR , 2015 ) OR LIMIT-TO ( PUBYEAR , 2014 ) OR LIMIT-TO ( PUBYEAR , 2013 ) OR LIMIT-TO ( PUBYEAR , 2012 ) OR LIMIT-TO ( PUBYEAR , 2011 ) OR LIMIT-TO ( PUBYEAR , 2010 ) OR LIMIT-TO ( PUBYEAR , 2009 ) OR LIMIT-TO ( PUBYEAR , 2008 ) OR LIMIT-TO ( PUBYEAR , 2007 ) OR LIMIT-TO ( PUBYEAR , 2006 ) OR LIMIT-TO ( PUBYEAR , 2005 ) OR LIMIT-TO ( PUBYEAR , 2004 ) OR LIMIT-TO ( PUBYEAR , 2003 ) OR LIMIT-TO ( PUBYEAR , 2002 ) OR LIMIT-TO ( PUBYEAR , 2001 ) OR LIMIT-TO ( PUBYEAR , 2000 ) ) )

**Web of Science:**

(TOPIC: (incidence\* or epidemio\*) OR TOPIC: (((number or new) NEAR/2 cases) or surveillance or biosurveillance or pharmacoepidemiolog\* or seroepidemio\* or (morbidity NEAR/2 (rate\* or pattern\*)) or infection-rate\* or sampl\* or age-distribution or sex-distribution or geographic-distribution\* or case-mix or community-assessment\* or disease-registr\* or prevalence)) AND TOPIC: (endocarditis) OR TOPIC: (endocarditis NEAR/5 (incidence\* or epidemio\* or cases or surveillance or biosurveillance or pharmacoepidemiolog\* or seroepidemio\* or rate\* or prevalence))) NOT TI=("case report\*" OR animal\* OR rat OR rats OR mice OR mouse OR rabbit\* OR rodent\*), Limit to English, Article, 2000+

Table 1: Quality assessment of included studies.

| <b>Study</b>       | <b>Adequacy of population definition</b> | <b>Sampling techniques</b> | <b>Disease definition</b> | <b>Completeness of case ascertainment</b> |
|--------------------|------------------------------------------|----------------------------|---------------------------|-------------------------------------------|
| Scudeller 2009     | Adequate                                 | Adequate                   | Adequate                  | Adequate                                  |
| Fedeli 2011        | Adequate                                 | Adequate                   | Inadequate                | Adequate                                  |
| Thornhill 2011     | Adequate                                 | Adequate                   | Inadequate                | Adequate                                  |
| Ternhag 2013       | Adequate                                 | Adequate                   | Inadequate                | Adequate                                  |
| Dayer 2015         | Adequate                                 | Adequate                   | Inadequate                | Adequate                                  |
| Cresti 2016        | Adequate                                 | Adequate                   | Adequate                  | Adequate                                  |
| Erichsen 2016      | Adequate                                 | Adequate                   | Inadequate                | Adequate                                  |
| Keller 2016        | Adequate                                 | Adequate                   | Inadequate                | Adequate                                  |
| van den Brink 2016 | Adequate                                 | Adequate                   | Inadequate                | Adequate                                  |
| Olmos 2017         | Adequate                                 | Adequate                   | Inadequate                | Adequate                                  |
| Ahtela 2018        | Adequate                                 | Adequate                   | Adequate                  | Adequate                                  |
| Jordal 2018        | Adequate                                 | Adequate                   | Adequate                  | Adequate                                  |
| Ortega 2019        | Adequate                                 | Adequate                   | Inadequate                | Adequate                                  |
| Jensen 2020        | Adequate                                 | Adequate                   | Inadequate                | Adequate                                  |
| Quan 2020          | Adequate                                 | Adequate                   | Inadequate                | Adequate                                  |
| Shah 2020          | Adequate                                 | Adequate                   | Inadequate                | Adequate                                  |
| Thornhill 2020     | Adequate                                 | Adequate                   | Inadequate                | Adequate                                  |
| Vähäsarja 2020     | Adequate                                 | Adequate                   | Adequate                  | Adequate                                  |

Table 2. Least squares regression slopes for each study in pooled log scale regression analysis for temporal trends of IE incidence, including Swedish studies.

| Studies Included            | Country                       | Incidence per 100k                   |             | Log incidence                 |              |
|-----------------------------|-------------------------------|--------------------------------------|-------------|-------------------------------|--------------|
|                             |                               | Estimated annual increase (per 100k) | 95% CI*     | Estimated annual increase (%) | 95% CI*      |
| Shah 2020                   | Scotland                      | 0.040                                | 0.033-0.047 | 0.54%                         | 0.44-0.64%   |
| Olmos 2017                  | Spain                         | 0.064                                | 0.050-0.078 | 2.09%                         | 1.61-2.57%   |
| Dayer & Thornhill 2011-2020 | England                       | 0.144                                | 0.126-0.162 | 4.23%                         | 3.82-4.64%   |
| Jensen 2020                 | Denmark                       | 0.312                                | 0.263-0.361 | 4.17%                         | 3.50-4.84%   |
| Fedeli 2011                 | Italy                         | 0.128                                | 0.052-0.204 | 2.83%                         | 1.58-4.08%   |
| Ahtela 2019                 | Finland                       | 0.103                                | 0.024-0.182 | 1.66%                         | 0.42-2.89%   |
| van den Brink 2016          | Netherlands                   | 0.583                                | 0.470-0.696 | 13.05%                        | 10.59-15.51% |
| Ternhag 2013                | Sweden (2000-2007)            | 0.169                                | 0.055-0.283 | 2.21%                         | 0.74-3.66%   |
| Vähäsarja 2020              | Sweden (2008-2017)            | 0.327                                | 0.209-0.445 | 5.76%                         | 3.63-7.89%   |
| Keller 2016                 | Germany                       | 0.535                                | 0.387-0.683 | 4.52%                         | 1.77-6.39%   |
|                             | Average of individual studies | 0.241                                | 0.103-0.378 | 4.11%                         | 1.59-6.62%   |
|                             | Pooled regression             | 0.161                                | 0.043-0.279 | 2.81%                         | 0.85-4.77%   |

\*CI: Confidence Interval

Figure 1: Individual and pooled incidence rate per 100,000/year, log scale regression, including Swedish studies.

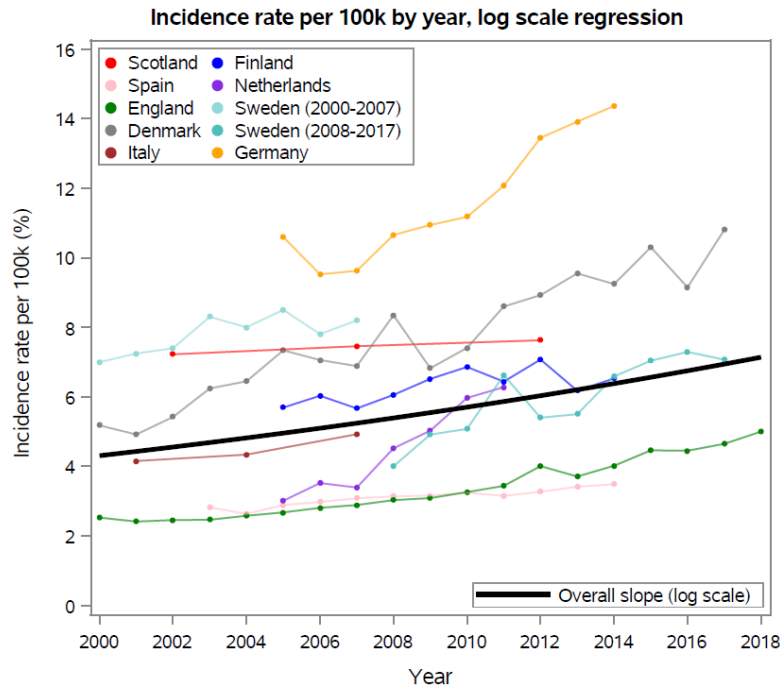

Supplement: openhrt-2021-001846supp001.pdf [file openhrt-2021-001846supp001.pdf]
